# Supplementary material for: Smart Synthesis of Trimethyl Ethoxysilane (TMS) Functionalized Core–Shell Magnetic Nanosorbents Fe3O4@SiO2: Process Optimization and Application for Extraction of Pesticides
Source: PubMed Central journal article supplement (PMC7587953; doi:10.3390/molecules25204827), 2020-10-20
Supplement: molecules-25-04827-s001.pdf [file molecules-25-04827-s001.pdf]

## Supporting information

**Table S1.** Analysis of Variance for Transformed Response in Case Measured Response is Magnetic Properties.

| Source                      | DF | Adj SS  | Adj MS  | F-Value | P-Value |
|-----------------------------|----|---------|---------|---------|---------|
| <b>Model</b>                | 6  | 90.9068 | 15.1511 | 42.50   | 0.000   |
| <b>Linear</b>               | 4  | 86.3826 | 21.5957 | 60.57   | 0.000   |
| <b>[TEOS]</b>               | 1  | 80.6953 | 80.6953 | 226.33  | 0.000   |
| <b>Ammonia</b>              | 1  | 0.6240  | 0.6240  | 1.75    | 0.209   |
| <b>Dose of Fe3O4</b>        | 1  | 4.3607  | 4.3607  | 12.23   | 0.004   |
| <b>Addition Mode</b>        | 1  | 0.7026  | 0.7026  | 1.97    | 0.184   |
| <b>2-Way</b>                | 1  | 3.7080  | 3.7080  | 10.40   | 0.007   |
| <b>Interactions</b>         |    |         |         |         |         |
| <b>[TEOS]*Dose of Fe3O4</b> | 1  | 3.7080  | 3.7080  | 10.40   | 0.007   |
| <b>Curvature</b>            | 1  | 0.8162  | 0.8162  | 2.29    | 0.154   |
| <b>Error</b>                | 13 | 4.6349  | 0.3565  |         |         |
| <b>Total</b>                | 19 | 95.5417 |         |         |         |

**Table S2.** Analysis of Variance for Transformed Response in Case Measured Response is PS.

| Source                       | DF | Adj SS  | Adj MS  | F-Value | P-Value |
|------------------------------|----|---------|---------|---------|---------|
| <b>Model</b>                 | 9  | 19.3435 | 2.1493  | 36.97   | 0.000   |
| <b>Blocks</b>                | 1  | 3.8536  | 3.8536  | 66.29   | 0.000   |
| <b>Linear</b>                | 4  | 11.4534 | 2.8633  | 49.26   | 0.000   |
| <b>[TEOS]</b>                | 1  | 10.3314 | 10.3314 | 177.72  | 0.000   |
| <b>Ammonia</b>               | 1  | 0.1099  | 0.1099  | 1.89    | 0.199   |
| <b>Dose of Fe3O4</b>         | 1  | 0.0002  | 0.0002  | 0.00    | 0.951   |
| <b>Addition Mode</b>         | 1  | 1.0118  | 1.0118  | 17.41   | 0.002   |
| <b>2-Way Interactions</b>    | 3  | 2.7518  | 0.9173  | 15.78   | 0.000   |
| <b>[TEOS]*Ammonia</b>        | 1  | 0.8894  | 0.8894  | 15.30   | 0.003   |
| <b>[TEOS]*Addition Mode</b>  | 1  | 1.5887  | 1.5887  | 27.33   | 0.000   |
| <b>Ammonia*Dose of Fe3O4</b> | 1  | 0.2736  | 0.2736  | 4.71    | 0.055   |
| <b>Curvature</b>             | 1  | 1.2848  | 1.2848  | 22.10   | 0.001   |
| <b>Error</b>                 | 10 | 0.5813  | 0.0581  |         |         |
| <b>Total</b>                 | 19 | 19.9248 |         |         |         |

**Table S3.** Analysis of Variance for Transformed Response in Case Measured Response is PSD.

| Source                       | DF | Adj SS  | Adj MS  | F-Value | P-Value |
|------------------------------|----|---------|---------|---------|---------|
| <b>Model</b>                 | 7  | 23.8228 | 3.4033  | 59.87   | 0.000   |
| <b>Linear</b>                | 4  | 18.5640 | 4.6410  | 81.64   | 0.000   |
| <b>[TEOS]</b>                | 1  | 18.1160 | 18.1160 | 318.69  | 0.000   |
| <b>Ammonia</b>               | 1  | 0.0006  | 0.0006  | 0.01    | 0.919   |
| <b>Dose of Fe3O4</b>         | 1  | 0.2315  | 0.2315  | 4.07    | 0.066   |
| <b>Addition Mode</b>         | 1  | 0.2159  | 0.2159  | 3.80    | 0.075   |
| <b>2-Way Interactions</b>    | 2  | 4.2952  | 2.1476  | 37.78   | 0.000   |
| <b>[TEOS]*Dose of Fe3O4</b>  | 1  | 3.2124  | 3.2124  | 56.51   | 0.000   |
| <b>Ammonia*Addition Mode</b> | 1  | 1.0827  | 1.0827  | 19.05   | 0.001   |
| <b>Curvature</b>             | 1  | 0.9636  | 0.9636  | 16.95   | 0.001   |
| <b>Error</b>                 | 12 | 0.6821  | 0.0568  |         |         |
| <b>Total</b>                 | 19 | 24.5049 |         |         |         |

**Table S4.** Physical properties of the produced samples

| # ID | Yield (Wy) | Attraction weight (Wa) | Ratio (Wa/ Wy) | FTIR ratio  | Notes             |                                              |               |
|------|------------|------------------------|----------------|-------------|-------------------|----------------------------------------------|---------------|
|      | gm         | gm                     |                |             | color/state       | Homogeneity                                  | volume        |
| 1    | 0.72152    | 1.8781                 | 2.6030         | 0.072716136 | brown powder (+)  | Homogenous                                   | around 5 ml   |
| 2    | 0.3569     | 0.528                  | 1.479405996    | 0.088856607 | brown powder (++) | there are pieces of white particles (silica) | around 2.5 ml |
| 3    | 0.7215     | 0.074                  | 0.102564103    | 0.072716136 | off white powder  | Homogenous                                   | around 5 ml   |

|    |         |         |             |             |                                                        |                                                                     |         |
|----|---------|---------|-------------|-------------|--------------------------------------------------------|---------------------------------------------------------------------|---------|
| 4  | 0.0978  | 1.1194  | 11.44580777 | 0.487067362 | Brown powder<br>(+++)                                  | homogenous                                                          | 0.5 ml  |
| 5  | 0.00991 | 0.1914  | 19.31382442 | 0.154508354 | brown powder<br>(+++)                                  | homogenous                                                          | 0.1 ml  |
| 6  | 0.36452 | 0.5142  | 1.410622188 | 0.103458844 | white cone with<br>internal brown<br>color (+++)       | composed of two separate<br>homogenous regions                      | 2 ml    |
| 7  | 0.698   | 0.0897  | 0.128510029 | 0.084808348 | off white powder                                       | Homogenous                                                          | 5 ml    |
| 8  | 0.03671 | 1.3695  | 37.3059112  | 1.177379076 | Brown powder<br>(++++)                                 | Homogenous                                                          | 0.3 ml  |
| 9  | 0.00414 | 0.29938 | 72.31400966 | 4.166648051 | almost black<br>powder                                 | Homogenous                                                          | 0.05 ml |
| 10 | 0.96211 | 0.2643  | 0.274708713 | 0.091625115 | brown powder                                           | Homogenous                                                          | 6 ml    |
| 11 | 0.00958 | 0.2017  | 21.05427975 | 0.230286364 | Brown (+++)<br>powder                                  | Homogenous, as there is<br>electrostatic charge on the<br>particles | 0.1 ml  |
| 12 | 0.034   | 1.2202  | 35.88823529 | 0.581771044 | Brown powder (++-<br>)                                 | Homogenous                                                          | 0.2 ml  |
| 13 | 0.73767 | 0.143   | 0.19385362  | 0.067054283 | solid white cone<br>with internal<br>brown color (+++) | composed of two separate<br>homogenous regions                      | 2.5 ml  |
| 14 | 0.3653  | 0.4153  | 1.136873802 | 5.334406727 | brown (+++)<br>powder with white<br>pieces             | heterogeneous                                                       | 1.0 ml  |

|    |         |         |             |             |                                                 |                                                         |        |
|----|---------|---------|-------------|-------------|-------------------------------------------------|---------------------------------------------------------|--------|
| 15 | 0.03749 | 1.3197  | 35.20138704 | 1.177379076 | Brown powder<br>(+++)                           | Homogenous                                              | 0.2 ml |
| 16 | 0.71152 | 0.578   | 0.812345401 | 0.084405797 | Brown (++) powder                               | Homogenous                                              | 4.0 ml |
| 17 | 0.03368 | 1.9699  | 58.48871734 | 5.334406727 | almost black<br>powder                          | Homogenous                                              | 0.2 ml |
| 18 | 0.01661 | 0.04949 | 2.9800      | 0.557276853 | Brown (++++)<br>powder                          | Homogenous (particles as have<br>electrostatic charges) | 0.2 ml |
| 19 | 0.00858 | 0.1853  | 21.5967366  | 0.570663012 | Brown(+++)<br>powder                            | Homogenous                                              | 0.2 ml |
| 20 | 0.91679 | 0.0763  | 0.083225166 | 0.088856607 | white cone with<br>internal brown<br>color (++) | composed of two separate<br>homogenous regions          | 3 ml   |

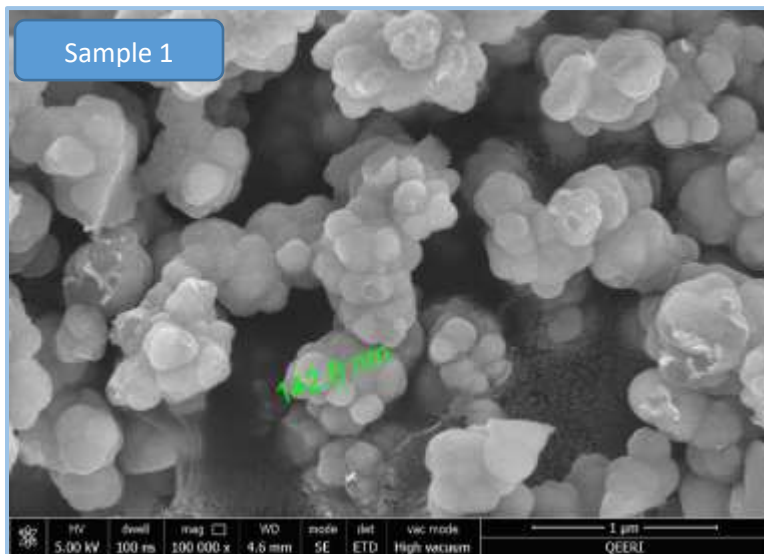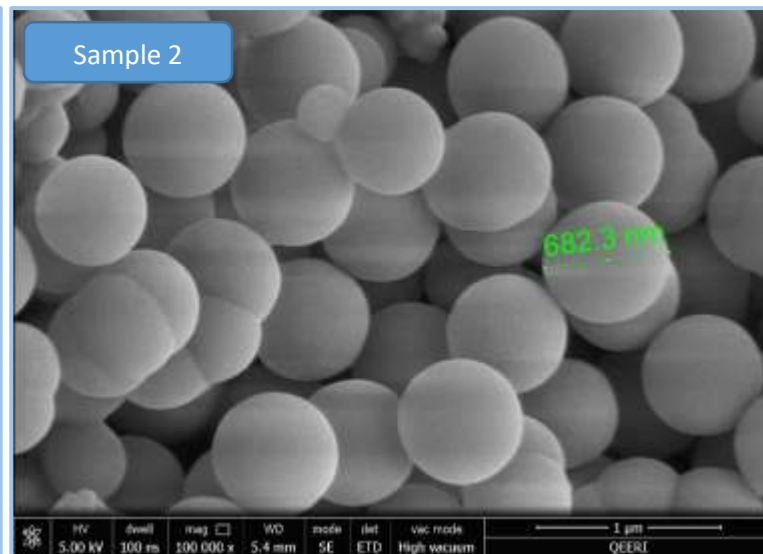

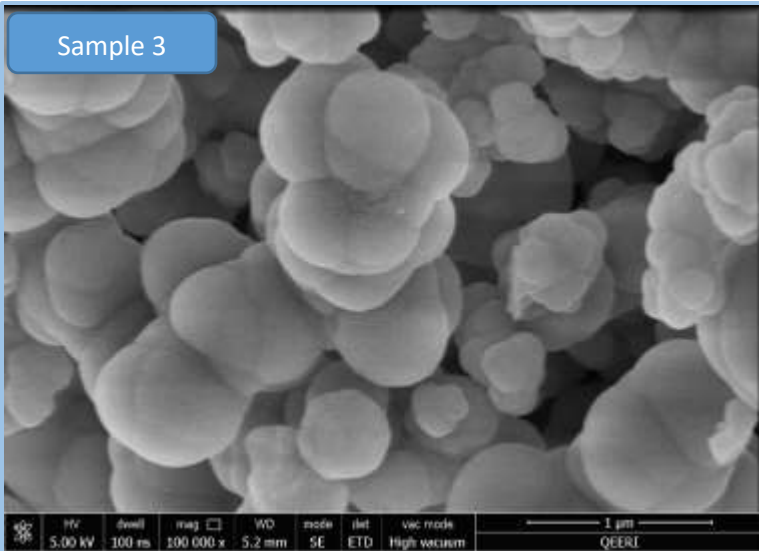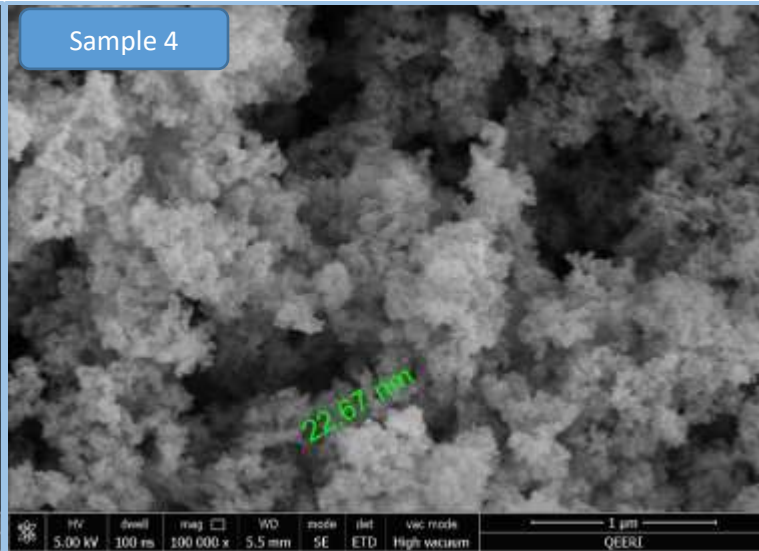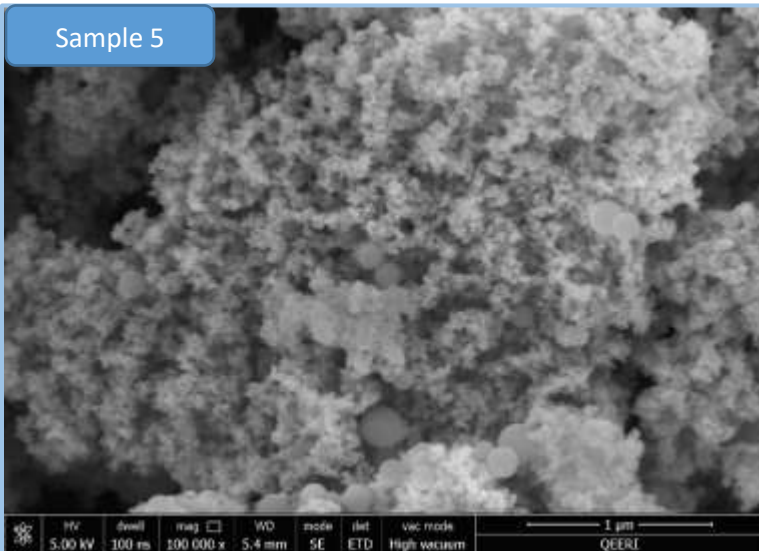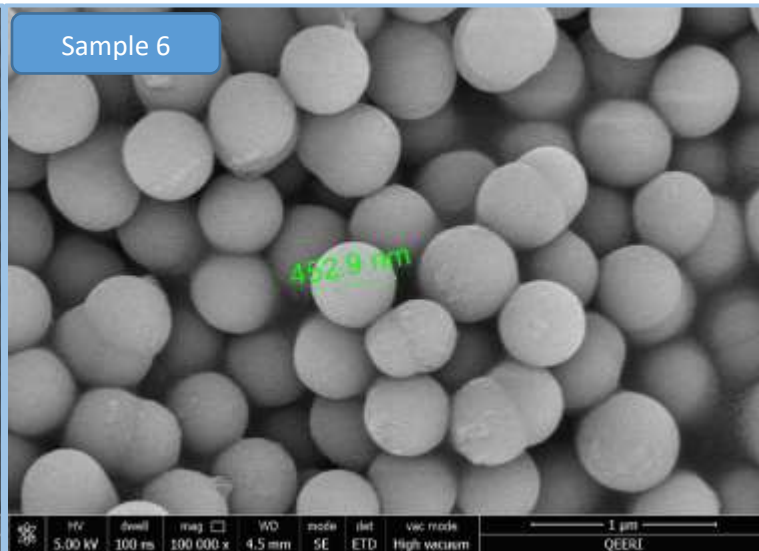

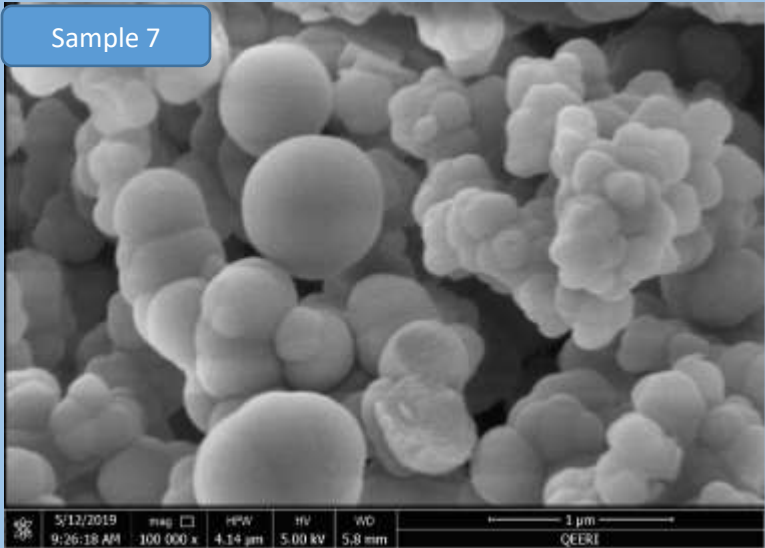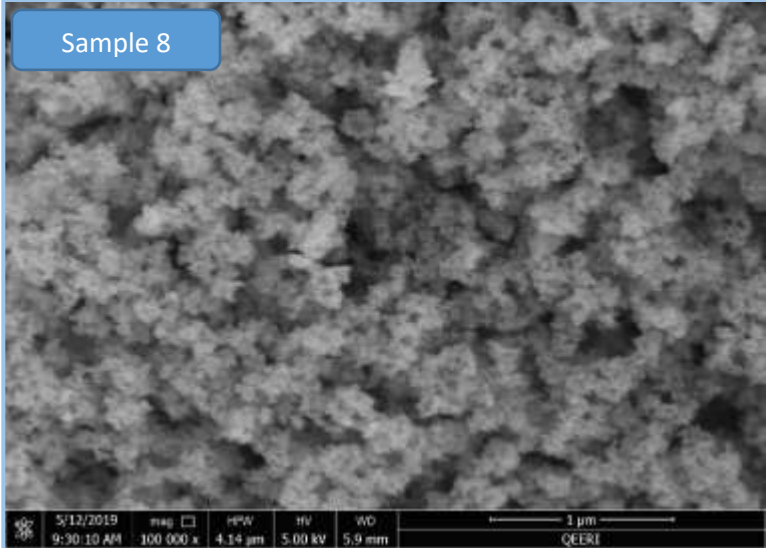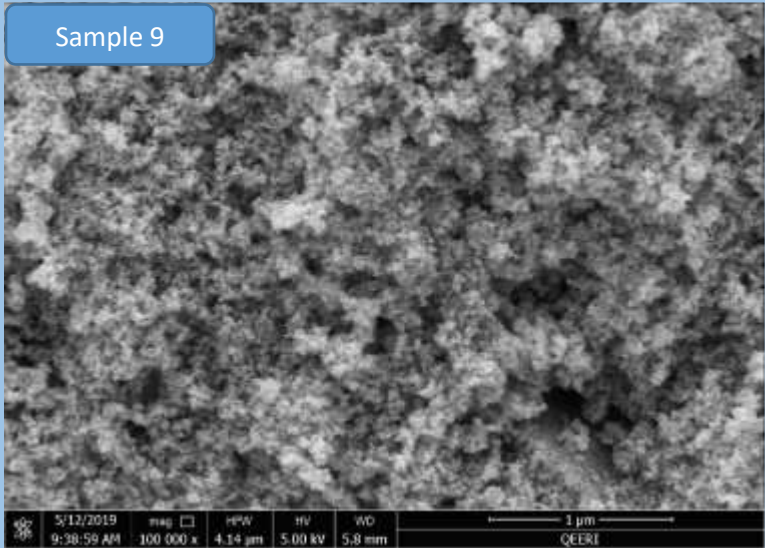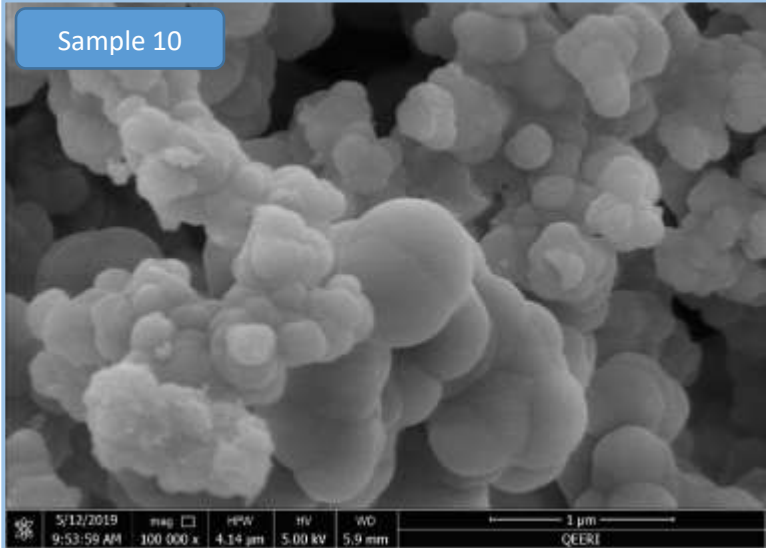

Sample 11

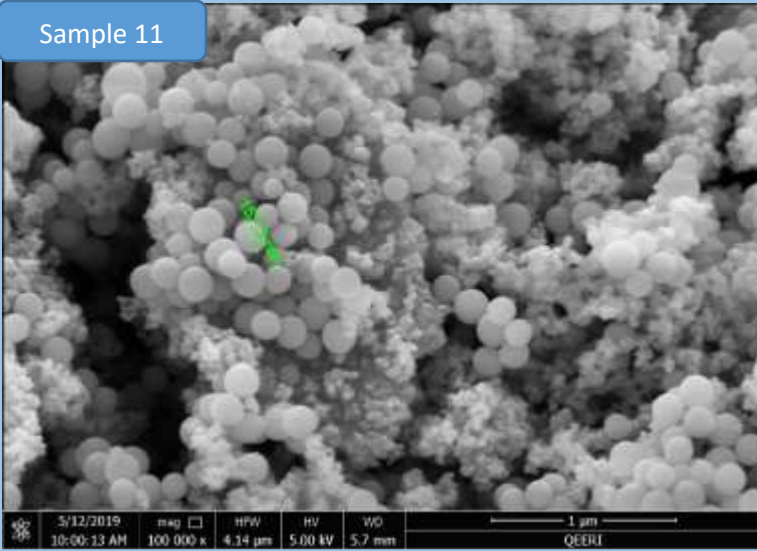

Sample 12

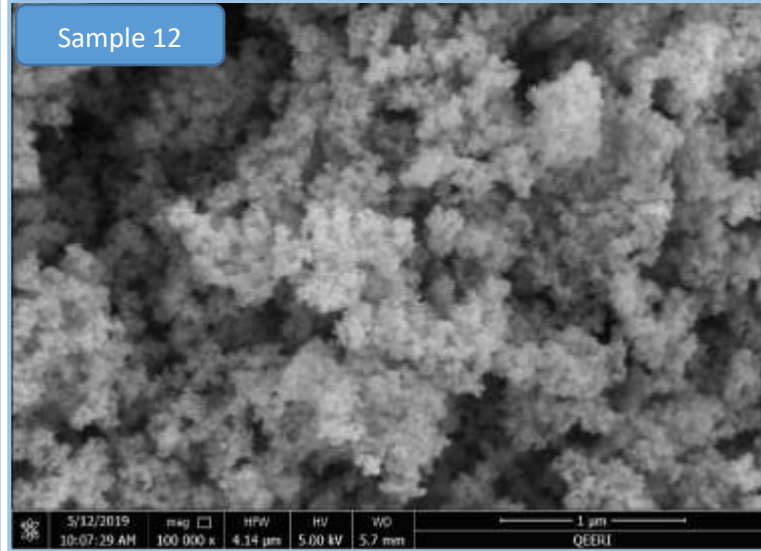

Sample 13

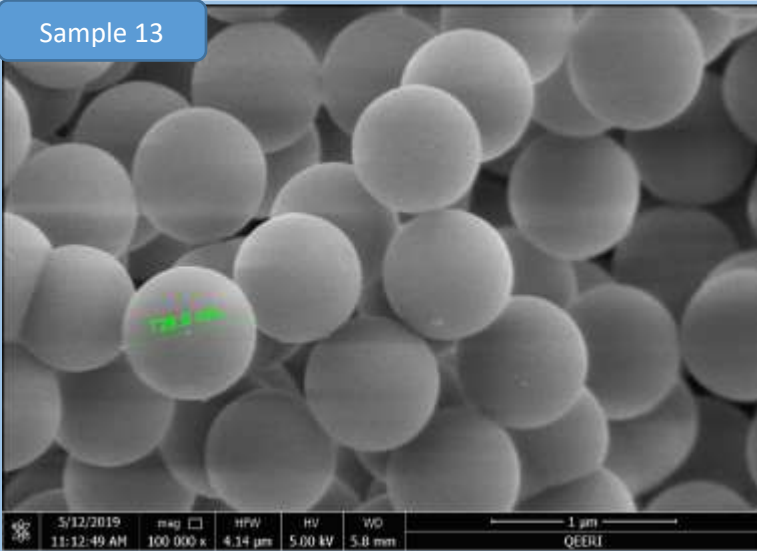

Sample 14

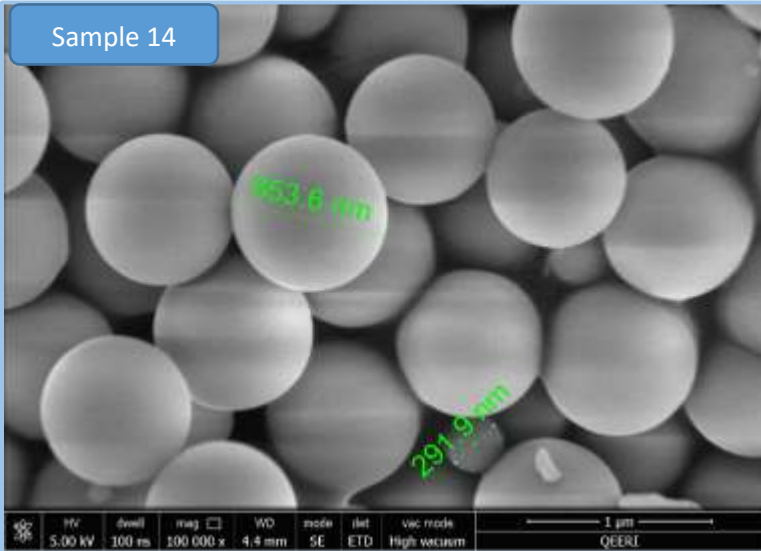

Sample 15

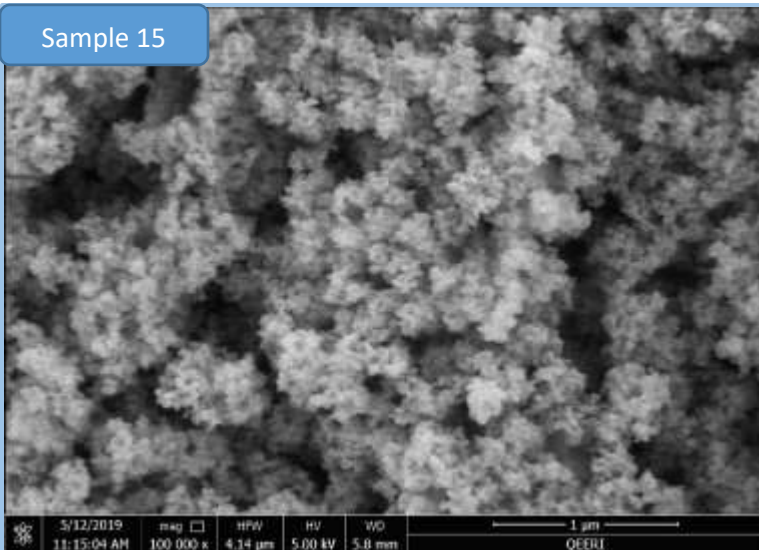

Sample 16

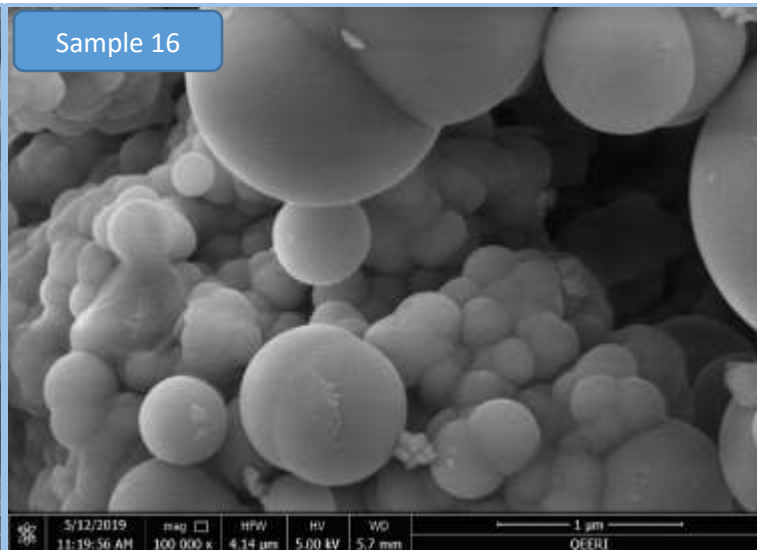

Sample 17

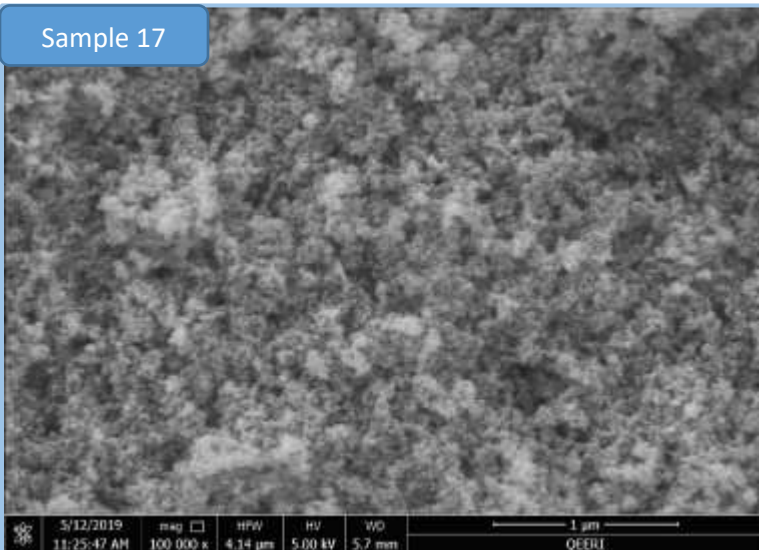

Sample 18

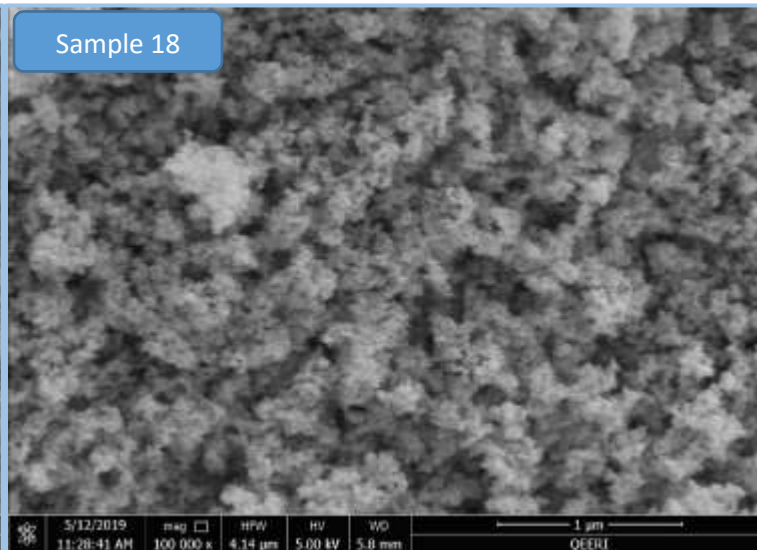



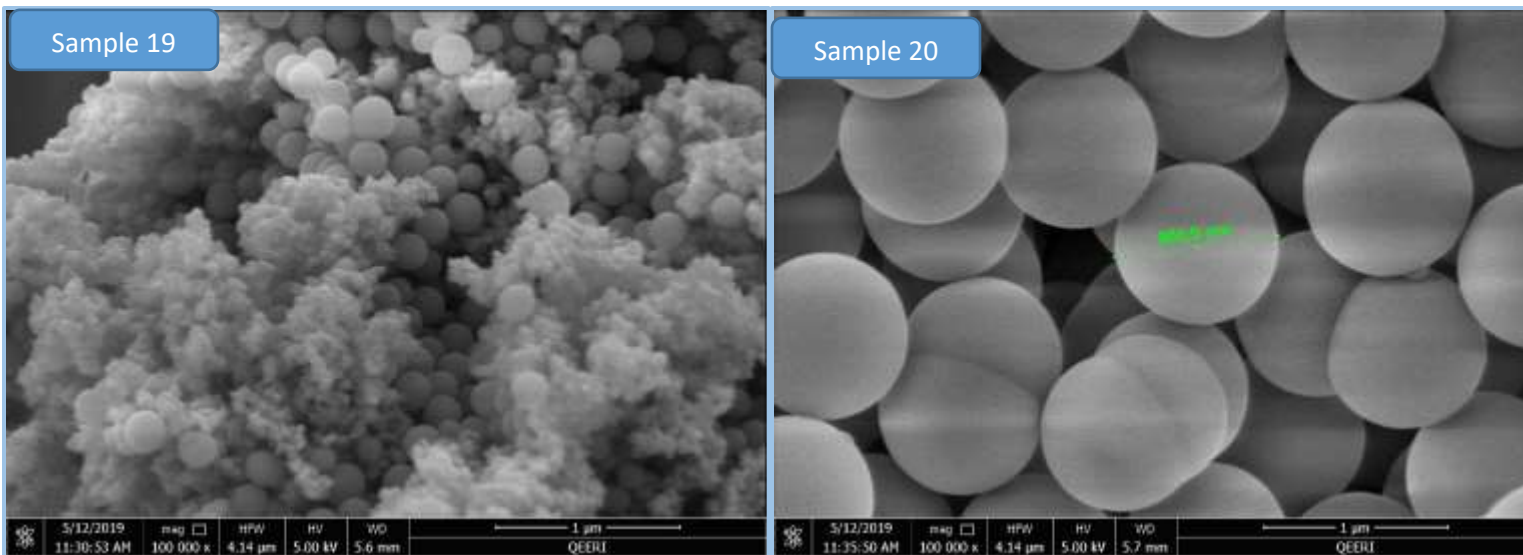

Figure S1. Micrographs of prepared samples as in Table S4.
